# Supplementary material for: Optimization of Selected Minerals and a Cytokinin for In Vitro Propagation of Little-Leaf Mockorange (Philadelphus microphyllus A. Gray) Using Response Surface Methodology (RSM)
Source: MDPI journal article supplement (doi:10.3390/plants13233446), 2024-12-09
Supplement: s1 [file s1]

**Table S1.** Summary of treatments and their nutrient or components compositions used in ½ strength MS (Murashige and Skoog) medium formulations for different experiments. The table displays the concentrations of macronutrients, micronutrients, organics, vitamins, and PGR (zeatin: cytokinin) along with specific pH values for each treatment.

[illegible]

[illegible]

[illegible]

[illegible]

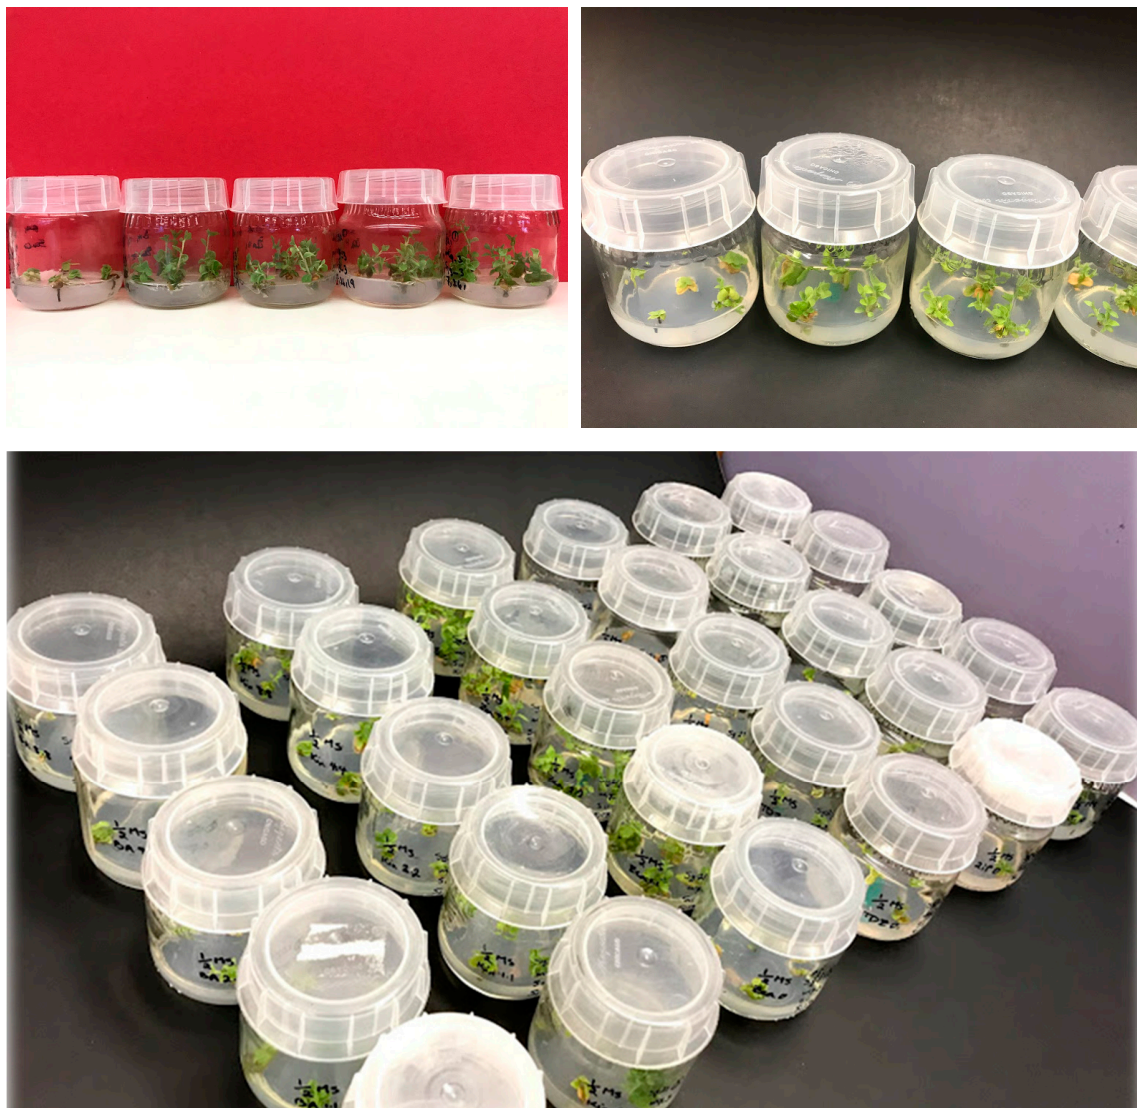

**Figure S1.** Explant growth response to various  $\frac{1}{2}$  MS (Murashige and Skoog) media formulations. Each jar illustrates a unique treatment condition, with adjustments in nutrient concentrations and/or plant growth regulators. The observed variations in explant growth, vigor, and morphology demonstrate the influence of specific  $\frac{1}{2}$  MS media compositions on plant development and health.

**Table S2.** Response surface model ANOVA for shoot number.

| Regression   | DF | Type I Sum of Squares | R-Square | F Value | Pr > F |
|--------------|----|-----------------------|----------|---------|--------|
| Covariates   | 1  | 0.009946              | 0.0003   | 0.05    | 0.8216 |
| Linear       | 4  | 2.778791              | 0.0703   | 3.56    | 0.0081 |
| Quadratic    | 4  | 4.083033              | 0.1033   | 5.23    | 0.0005 |
| Crossproduct | 6  | 0.282372              | 0.0071   | 0.24    | 0.9622 |
| Total Model  | 15 | 7.154142              | 0.1810   | 2.45    | 0.0030 |

**Table S3.** Response surface model ANOVA for shoot length.

| Regression   | DF | Type I Sum of Squares | R-Square | F Value | Pr > F |
|--------------|----|-----------------------|----------|---------|--------|
| Covariates   | 1  | 0.527309              | 0.0121   | 2.47    | 0.1180 |
| Linear       | 4  | 1.104518              | 0.0253   | 1.29    | 0.2748 |
| Quadratic    | 4  | 5.651633              | 0.1295   | 6.62    | <.0001 |
| Crossproduct | 6  | 0.918759              | 0.0210   | 0.72    | 0.6363 |
| Total Model  | 15 | 8.202219              | 0.1879   | 2.56    | 0.0018 |

**Table S4.** Response surface model ANOVA for dry weight.

| Regression   | DF | Type I Sum of Squares | R-Square | F Value | Pr > F |
|--------------|----|-----------------------|----------|---------|--------|
| Covariates   | 1  | 0.004459              | 0.0045   | 0.91    | 0.3412 |
| Linear       | 4  | 0.019390              | 0.0196   | 0.99    | 0.4143 |
| Quadratic    | 4  | 0.119422              | 0.1209   | 6.10    | 0.0001 |
| Crossproduct | 6  | 0.022185              | 0.0225   | 0.76    | 0.6059 |
| Total Model  | 15 | 0.165457              | 0.1675   | 2.25    | 0.0065 |

**Table S5.** Response surface model parameter estimates for shoot number.

| Parameter     | DF | Estimate  | Standard Error | t Value | Pr >  t | Parameter Estimate from Coded Data |
|---------------|----|-----------|----------------|---------|---------|------------------------------------|
| Intercept     | 1  | -6.023576 | 4.222478       | -1.43   | 0.1556  | 1.875820                           |
| N             | 1  | 0.045609  | 0.058788       | 0.78    | 0.4390  | 0.126114                           |
| Ca            | 1  | 0.726967  | 1.174560       | 0.62    | 0.5368  | 0.102425                           |
| Zeatin        | 1  | 6.564790  | 3.196774       | 2.05    | 0.0416  | -0.105132                          |
| P             | 1  | 2.682570  | 1.309471       | 2.05    | 0.0421  | -0.077912                          |
| N*N           | 1  | -0.000241 | 0.000323       | -0.74   | 0.4574  | -0.054133                          |
| Ca*N          | 1  | -0.001129 | 0.010157       | -0.11   | 0.9116  | -0.012706                          |
| Ca*Ca         | 1  | -0.052491 | 0.129201       | -0.41   | 0.6851  | -0.029526                          |
| Zeatin*N      | 1  | 0.001383  | 0.026763       | 0.05    | 0.9589  | 0.005703                           |
| Zeatin*Ca     | 1  | 0.103206  | 0.535266       | 0.19    | 0.8473  | 0.021286                           |
| Zeatin*Zeatin | 1  | -3.303946 | 0.955337       | -3.46   | 0.0007  | -0.249861                          |
| P*N           | 1  | -0.005165 | 0.011776       | -0.44   | 0.6615  | -0.048420                          |
| P*Ca          | 1  | -0.256558 | 0.235517       | -1.09   | 0.2776  | -0.120262                          |
| P*Zeatin      | 1  | -0.083215 | 0.642319       | -0.13   | 0.8971  | -0.014303                          |
| P*P           | 1  | -0.654618 | 0.184953       | -3.54   | 0.0005  | -0.255710                          |
| K             | 1  | -0.001247 | 0.005520       | -0.23   | 0.8216  | -0.001247                          |

**Table S6.** Response surface model parameter estimates for shoot length.

| Parameter     | D<br>F | Estimate  | Standard<br>Error | t Value | Pr >  t | Parameter Estimate from Coded<br>Data |
|---------------|--------|-----------|-------------------|---------|---------|---------------------------------------|
| Intercept     | 1      | -9.885361 | 4.418397          | -2.24   | 0.0266  | 1.379966                              |
| N             | 1      | 0.067438  | 0.061515          | 1.10    | 0.2745  | 0.089374                              |
| Ca            | 1      | 1.295560  | 1.229059          | 1.05    | 0.2934  | 0.053045                              |
| Zeatin        | 1      | 8.411983  | 3.345101          | 2.51    | 0.0129  | -0.077002                             |
| P             | 1      | 4.064347  | 1.370229          | 2.97    | 0.0035  | 0.021529                              |
| N*N           | 1      | -0.000646 | 0.000338          | -1.91   | 0.0577  | -0.145317                             |
| Ca*N          | 1      | 0.010295  | 0.010629          | 0.97    | 0.3342  | 0.115816                              |
| Ca*Ca         | 1      | -0.196383 | 0.135196          | -1.45   | 0.1482  | -0.110466                             |
| Zeatin*N      | 1      | 0.001375  | 0.028005          | 0.05    | 0.9609  | 0.005673                              |
| Zeatin*Ca     | 1      | -0.200447 | 0.560102          | -0.36   | 0.7209  | -0.041342                             |
| Zeatin*Zeatin | 1      | -3.676595 | 0.999664          | -3.68   | 0.0003  | -0.278043                             |
| P*N           | 1      | -0.013094 | 0.012322          | -1.06   | 0.2895  | -0.122756                             |
| P*Ca          | 1      | -0.355782 | 0.246445          | -1.44   | 0.1507  | -0.166773                             |
| P*Zeatin      | 1      | -0.097140 | 0.672122          | -0.14   | 0.8853  | -0.016696                             |
| P*P           | 1      | -0.828218 | 0.193535          | -4.28   | <.0001  | -0.323523                             |
| K             | 1      | -0.009077 | 0.005776          | -1.57   | 0.1180  | -0.009077                             |



**Table S7.** Response surface model parameter estimates for dry weight.

| Parameter     | DF | Estimate  | Standard Error | t Value | Pr >  t | Parameter Estimate from Coded Data |
|---------------|----|-----------|----------------|---------|---------|------------------------------------|
| Intercept     | 1  | -1.622966 | 0.665601       | -2.44   | 0.0158  | 0.213012                           |
| N             | 1  | 0.015592  | 0.009274       | 1.68    | 0.0946  | 0.012367                           |
| Ca            | 1  | 0.178355  | 0.185473       | 0.96    | 0.3376  | 0.008744                           |
| Zeatin        | 1  | 1.374083  | 0.505432       | 2.72    | 0.0072  | -0.008533                          |
| P             | 1  | 0.518414  | 0.207333       | 2.50    | 0.0134  | -0.000875                          |
| N*N           | 1  | -0.000116 | 0.000050631    | -2.30   | 0.0229  | -0.026159                          |
| Ca*N          | 1  | 0.000712  | 0.001555       | 0.46    | 0.6477  | 0.008006                           |
| Ca*Ca         | 1  | -0.022486 | 0.020252       | -1.11   | 0.2685  | -0.012648                          |
| Zeatin*N      | 1  | -0.002015 | 0.004240       | -0.48   | 0.6352  | -0.008312                          |
| Zeatin*Ca     | 1  | 0.016636  | 0.084800       | 0.20    | 0.8447  | 0.003431                           |
| Zeatin*Zeatin | 1  | -0.604576 | 0.150637       | -4.01   | <.0001  | -0.045721                          |
| P*N           | 1  | -0.000596 | 0.001866       | -0.32   | 0.7498  | -0.005588                          |
| P*Ca          | 1  | -0.074160 | 0.037312       | -1.99   | 0.0485  | -0.034763                          |
| P*Zeatin      | 1  | -0.008073 | 0.101760       | -0.08   | 0.9369  | -0.001387                          |
| P*P           | 1  | -0.101094 | 0.029163       | -3.47   | 0.0007  | -0.039490                          |
| K             | 1  | -0.000835 | 0.000875       | -0.95   | 0.3412  | -0.000835                          |
